# Supplementary material for: Polyimide foams with outstanding flame resistance and mechanical properties by the incorporation of noncovalent bond modified graphene oxide
Source: Royal Society of Chemistry journal article supplement (doi:10.1039/d0nj01983f), 2020-01-01
Supplement: d0nj01983f1.pdf [file d0nj01983f1.pdf]

**Polyimide foams with outstanding flame resistance and mechanical properties by  
the incorporation of noncovalent bond modified graphene oxide**

Hongtao Liu<sup>1</sup>, Huafeng Tian<sup>1\*</sup>, Yuanyuan Yao<sup>1</sup>, Aiming Xiang<sup>1\*</sup>, Haisong Qi<sup>2</sup>, Qiangxian  
Wu<sup>3</sup>, A. Varada Rajulu<sup>4</sup>

<sup>1</sup>Beijing Key Laboratory of Quality Evaluation Technology for Hygiene and Safety of  
Plastics, College of chemistry and materials engineering of Beijing Technolgy &  
Business University, Beijing, China

<sup>2</sup> State Key Laboratory of Pulp and Paper Engineering, South China University of  
Technology, Guangzhou, 510640, China

<sup>3</sup> Green Polymer Laboratory, College of Chemistry, Central China Normal University,  
Wuhan 430079, China

<sup>4</sup> Centre for Composite Materials, International Research Centre, Kalasalingam  
University, Anand Nagar, Krishnan Koil, India

---

\*Corresponding author: H.Tian; e-mail address: tianhuafeng@th.btbu.edu.cn or A.Xiang;  
xaming@th.btbu.edu.cn.



## supplementary material

Figure S1 showed the cell size distribution of PI foam with different GO content. It can be seen the cell distribution was uniform, when the GO content reached 0.3%. This moment, the cells became homogeneously distributed gradually and the cell distribution was narrow. After modified by Do, the average cell diameter further decreased and most of them distributed between 0.3mm and 0.5mm, which led to the uniformity of foam.

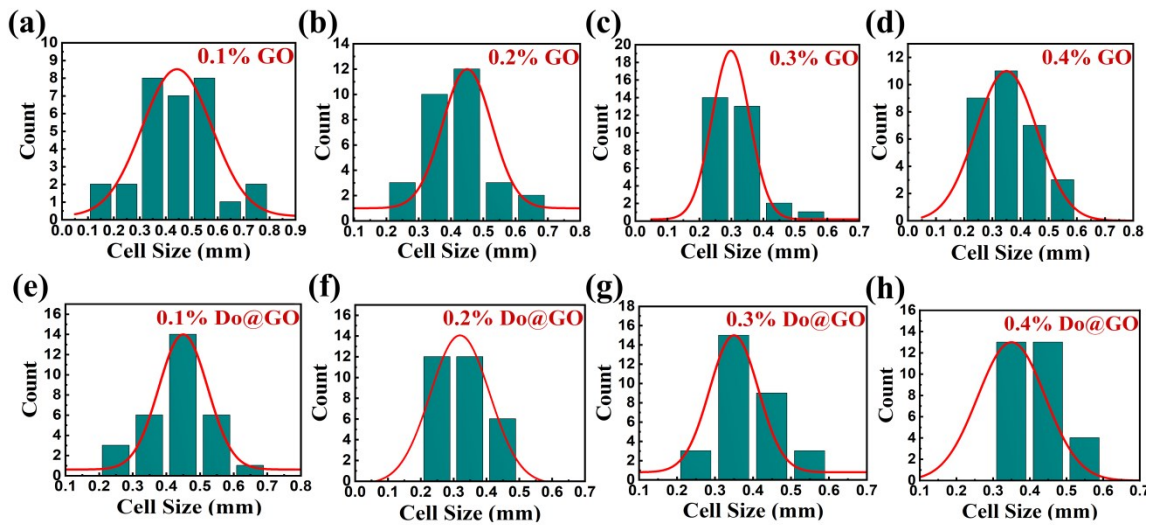

Figure S1. The cell size distribution of PI foam with different GO content. a-d-without dopamine modification, e-h-dopamine modification

Figure S2 showed the TGA and DTG curves of PI foam with different content of GO and Do@GO in nitrogen atmosphere.

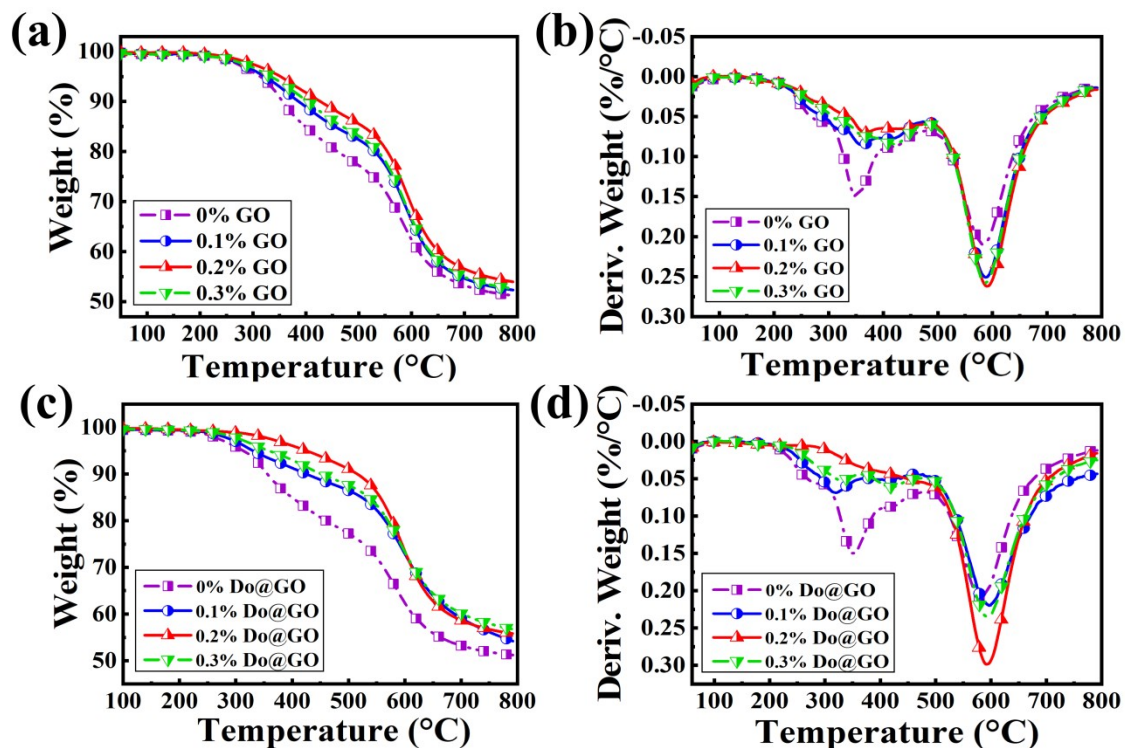

Figure S2. TGA and DTG curves of PI foams with different content of GO and Do@GO in nitrogen atmosphere. a-TGA curve of PI/GO, b-DTG curve of PI/GO, c-TGA curve of PI/Do@GO, d-DTG curve of PI/Do@GO.

3

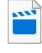

Video of testing the flame retardancy of PI foam.mp4

File S3. Video of testing the flame retardancy of PI foam.
